# Supplementary material for: Immune escape of colorectal tumours via local LRH‐1/Cyp11b1‐mediated synthesis of immunosuppressive glucocorticoids
Source: PubMed Central journal article supplement (PMC10399709; doi:10.1002/1878-0261.13414), 2023-03-09
Supplement: MOL2-17-1545-s001.pdf [file MOL2-17-1545-s001.pdf]

# **Colorectal tumors escape from immune surveillance through local synthesis of immunosuppressive glucocorticoids**

## **Supplementary Figures**

## Suppl. Figure 1

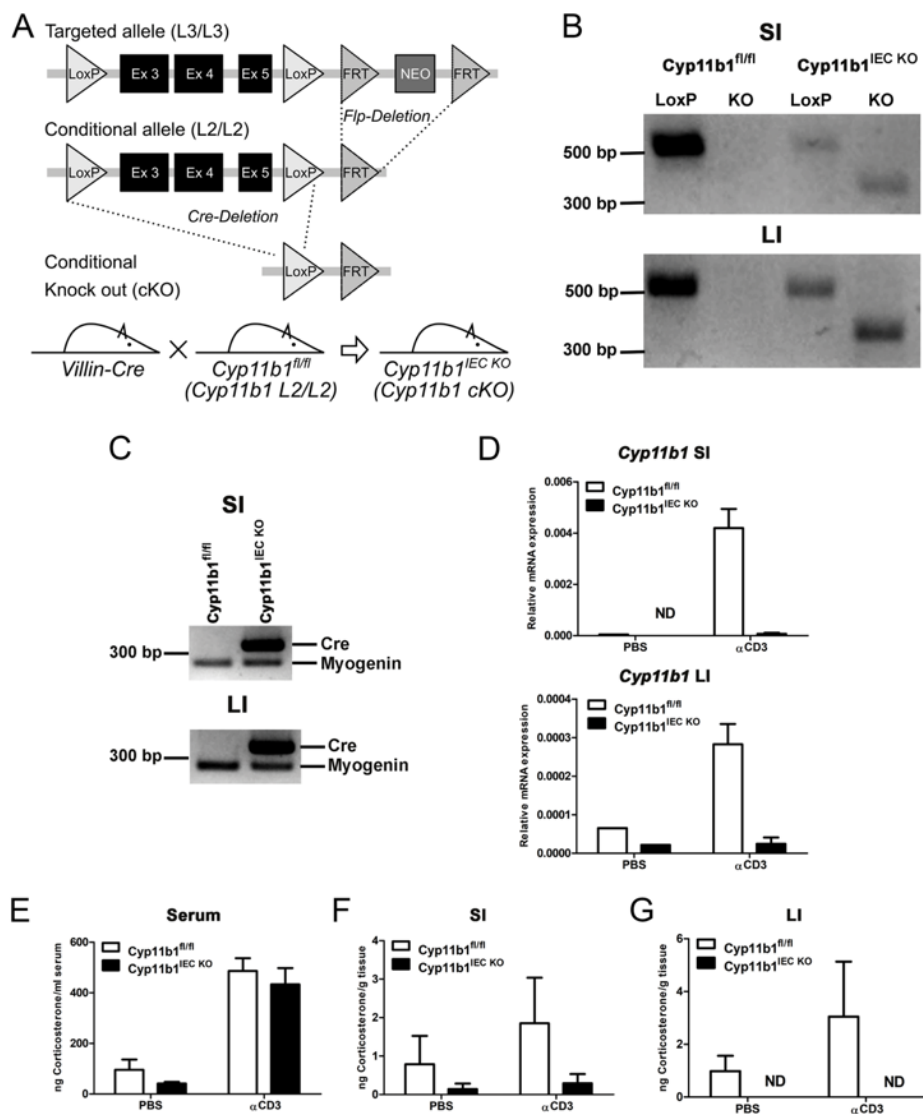Suppl. Figure 1: Generation and characterization of intestine-specific *Cyp11b1*-deficient mice.

**A.** Targeting strategy for Cre recombinase-mediated deletion of Exon 3-5 of the *Cyp11b1* gene. **B.** Detection of floxed and knockout alleles in the small (SI) and large intestine (LI) of *Cyp11b1<sup>fl/fl</sup>* and *Cyp11b1<sup>IEC KO</sup>* mice by PCR. **C.** Detection of Cre in small (SI) and large intestine (LI) of *Cyp11b1<sup>IEC KO</sup>* mice by PCR. **D.** Detection of *Cyp11b1* mRNA expression in small (SI) and large intestine (LI) of PBS or anti-CD3-injected *Cyp11b1<sup>fl/fl</sup>* and *Cyp11b1<sup>IEC KO</sup>* mice. **E.** Serum glucocorticoid levels of *Cyp11b1<sup>fl/fl</sup>* and *Cyp11b1<sup>IEC KO</sup>* mice. **F, G.** *Ex vivo* glucocorticoid synthesis in small (SI) (F) and large intestine (LI) (G) of PBS or anti-CD3 ( $\alpha$ CD3)-injected *Cyp11b1<sup>fl/fl</sup>* and *Cyp11b1<sup>IEC KO</sup>* mice. d-g: n = 3 mice per group. ND, not detected.

## Suppl. Fig. 2

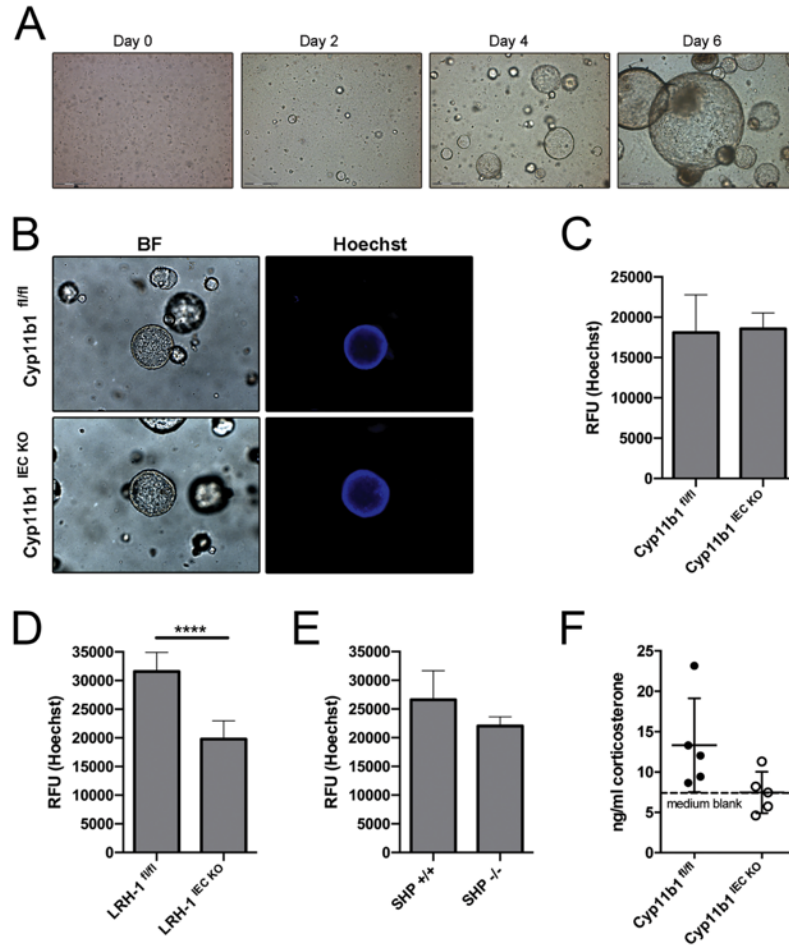

**Suppl. Figure 2: *In vitro* growth of tumor organoids.** Tumor cells were isolated from colonic tissue of LRH-1<sup>fl/fl</sup>, LRH-1<sup>IEC KO</sup>, SHP<sup>+/+</sup>, SHP<sup>-/-</sup>, Cyp11b1<sup>fl/fl</sup> and Cyp11b1<sup>IEC KO</sup> mice, and expanded *in vitro* as tumor organoids. **A.** Representative pictures of tumor organoid growth. **B.** Staining of tumor organoids with cell-permeable Hoechst. **C-E.** Quantification of tumor organoid growth at day 4. **C.** Cyp11b1<sup>fl/fl</sup> and Cyp11b1<sup>IEC KO</sup>, **D.** LRH-1<sup>fl/fl</sup>, LRH-1<sup>IEC KO</sup>, **E.** SHP<sup>+/+</sup>, SHP<sup>-/-</sup>. Unpaired students T Test, \*\*\*\* p < 0.0001. **F.** Detection of corticosterone in the culture supernatant of Cyp11b1<sup>fl/fl</sup> and Cyp11b1<sup>IEC KO</sup> tumor organoids. Mean values +/- SD of n = 5 individual culture samples are shown. The dashed line indicates basal levels in culture medium alone.

## Suppl. Fig. 3

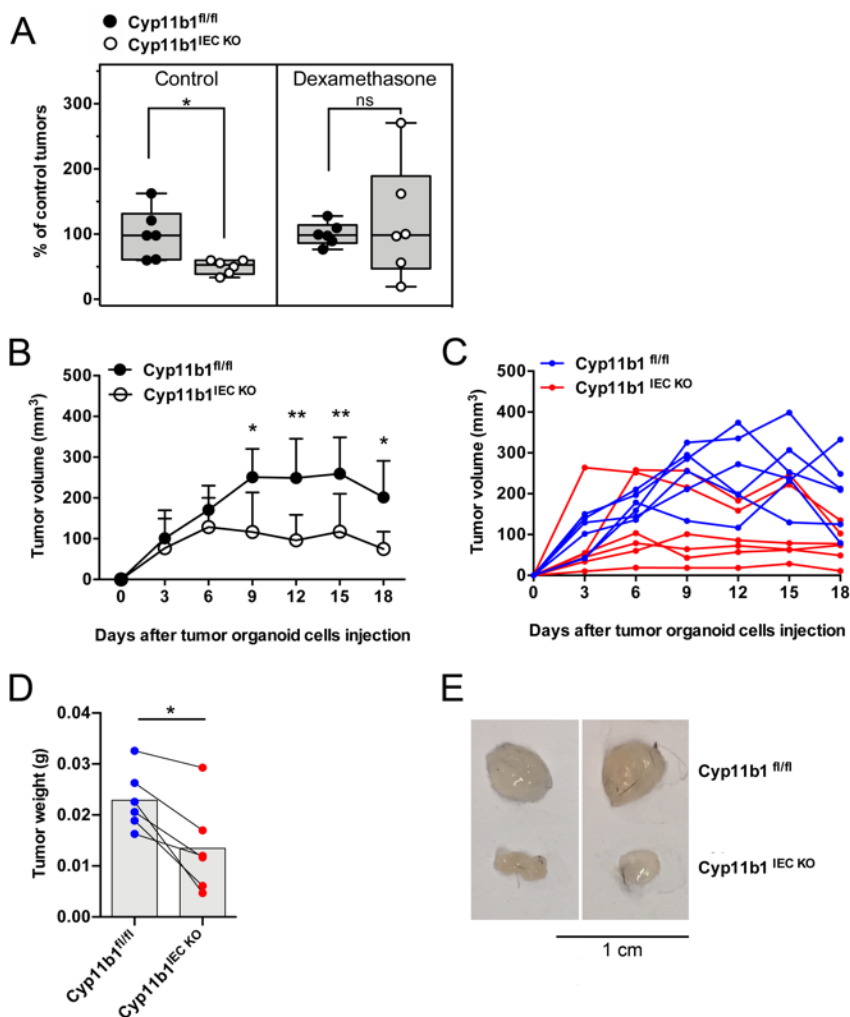

**Suppl. Figure 3: Effect of dexamethasone treatment or *Cyp11b1* deletion on *in vivo* growth of s.c. transplanted tumors.**

**A.** Tumor organoids from Cyp11b1<sup>fl/fl</sup> and Cyp11b1<sup>IEC KO</sup> mice were transplanted s.c. into wild type C57Bl/6 recipient mice. Recipient mice were left untreated (Control) or received 0.28 mg/ml dexamethasone in the drinking water ad libitum. At day 24, tumors were isolated and the tumor volume was analyzed (n = 6 per condition). Tumor volume was normalized to that of Cyp11b1<sup>fl/fl</sup> in the control group, resp. in the dexamethasone-treated group for comparison. Paired students T Test, \* p < 0.05, ns not significant.

**B-E.** Cyp11b1<sup>fl/fl</sup> tumor organoids were transduced *in vitro* with Cre-expressing lentiviruses to delete the *Cyp11b1* gene. Resulting Cyp11b1-deficient tumor organoids (Cyp11b1<sup>IEC-KO</sup>) or parental tumor organoids (Cyp11b1<sup>fl/fl</sup>) as controls were transplanted s.c. into wild type C57Bl/6 recipient mice. **B.** Tumor volume. **C.** Tumor volume of individual tumors. **D.** Tumor weight. Control tumors and Cyp11b1-deleted tumors in the same recipient mice are connected by lines. **E.** Examples of tumor pairs isolated from the same recipient mice. Paired students T Test, \* p < 0.05, \*\* p < 0.01.

## Suppl. Fig. 4

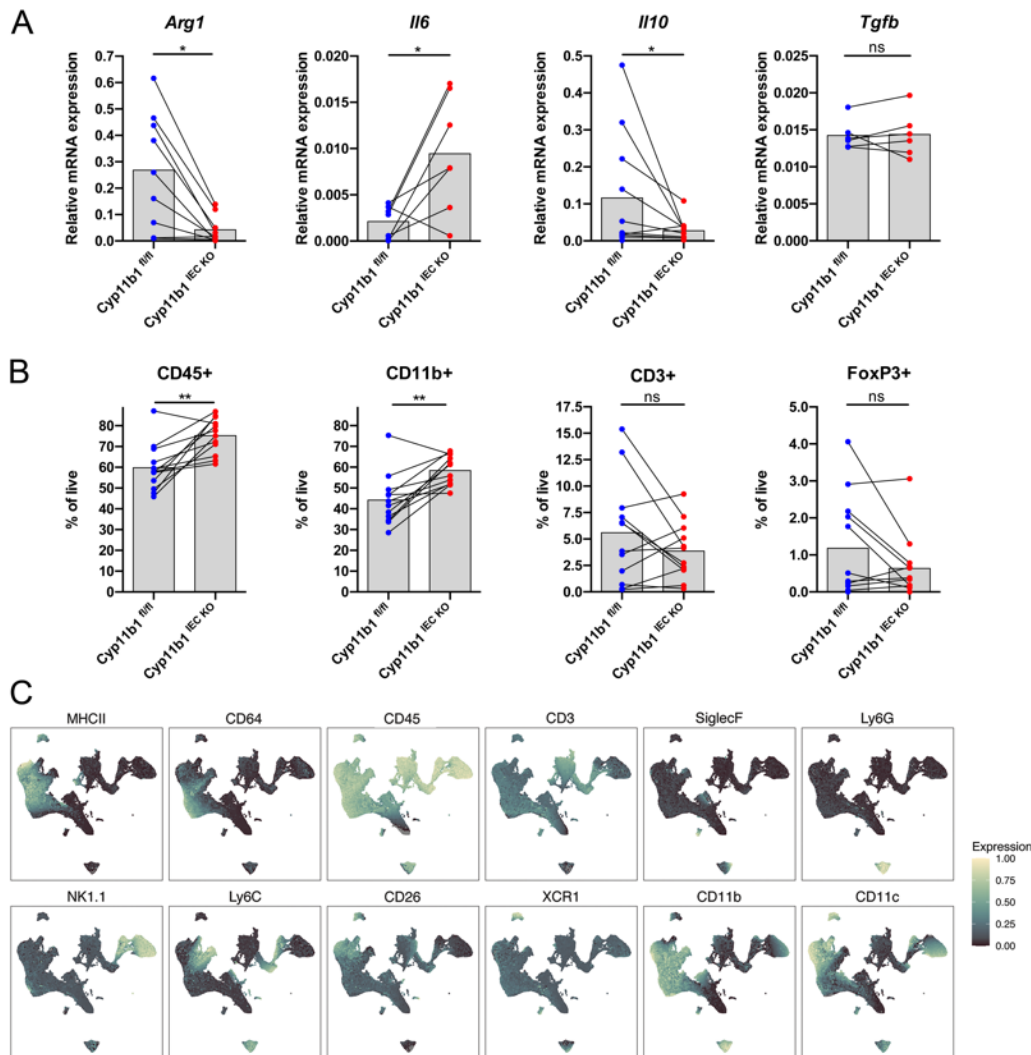**Suppl. Figure 4: Characterization of tumor immune infiltrates.**

**A.** Detection of *Arg1*, *Il6*, *Il10* and *Tgfb* in *Cyp11b1<sup>fl/fl</sup>* and *Cyp11b1<sup>IEC-KO</sup>* tumors transplanted into wild type recipient mice at day 12 (n = 6-11 per group). **B.** Percentage of tumor-infiltrating CD45<sup>+</sup>, CD11b<sup>+</sup>, CD3<sup>+</sup> and FoxP3<sup>+</sup> immune cells into *Cyp11b1<sup>fl/fl</sup>* or *Cyp11b1<sup>IEC-KO</sup>* tumors transplanted into wild type recipient mice at day 12 (n = 12 mice per group). Data points of tumors from the same recipient mice have been connected by lines. Paired student's T test. \* p < 0.05, \*\* p < 0.01, ns not significant. **C.** UMAP plots with 100'000 cells pooled from all tumor samples (10'000 cells randomly sampled per tumor) and overlaid heatmap lineage marker expression.

## Suppl. Fig. 5

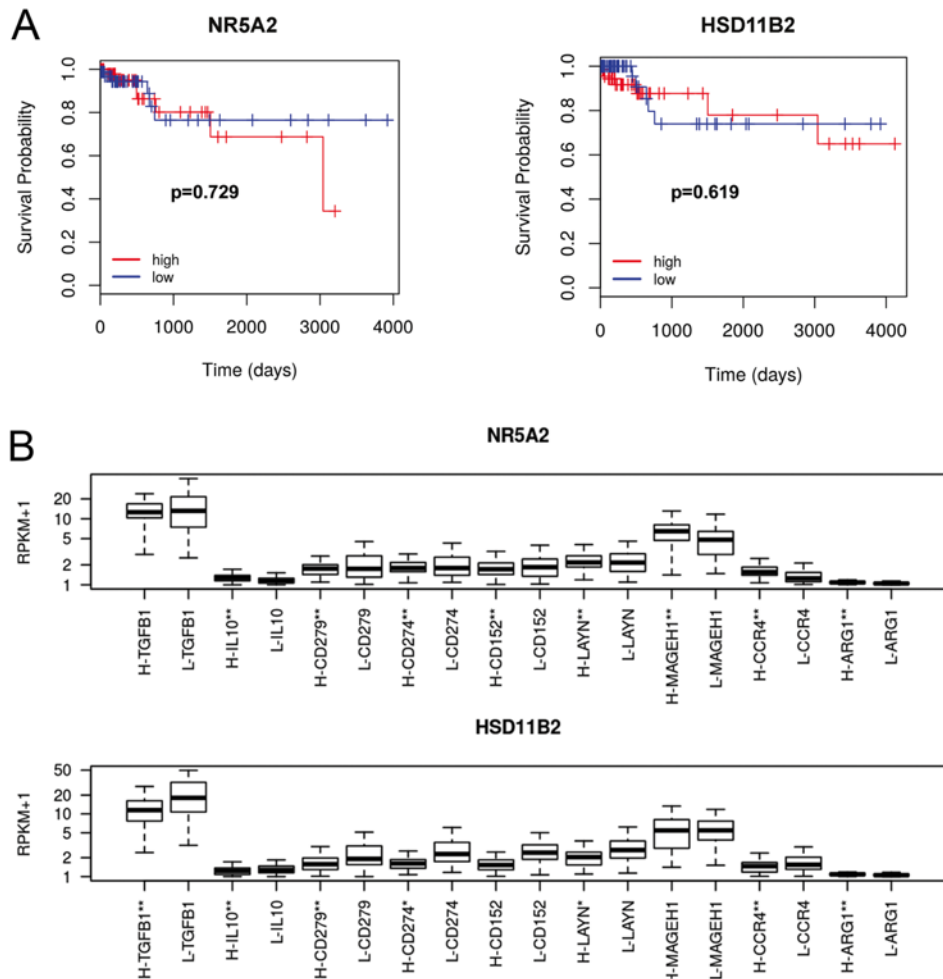

**Suppl. Figure 5: Effect of NR5A2 and HSD11B2 expression on colorectal patient survival and immune marker expression.**

**A.** Colon cancer patients were stratified into groups of the highest or lowest quartile expression of the genes *NR5A2* (LRH-1) and *HSD11B2*, and survival was analyzed. Statistical differences ( $p$  values) are indicated. **B.** Individual tumor from the highest or lowest quartile expression of *NR5A2* and *HSD11B2* were analyzed for the expression of genes related to immunoregulatory cytokines (*TGFB1*, *IL10*), immune checkpoints (*CD279* (PD1), *CD274* (PD1-L), *CD152* (CTLA4), and M2-like macrophage markers (*LAVN*, *CCR4*, *ARG1*). The data were derived from 379 colon adenocarcinoma (COAD) samples from the TCGA database using upper (high) quartile ( $n = 95$ ) vs. lower (low) quartile ( $n = 95$ ) expression of the given gene (H: highest quartile, L: lowest quartile of *NR5A2*, resp. *HSD11B2* expressors). The expression levels of immune genes are shown as the log RPKM - Reads per kilo base per million mapped reads. Box plots with median values, and lower and upper quartiles, and minima and maxima are shown. Wilcoxon's signed rank test. \*  $p < 0.05$ , \*\*  $p < 0.01$  between high and low expressors.
