# Supplementary material for: Immune escape of colorectal tumours via local LRH‐1/Cyp11b1‐mediated synthesis of immunosuppressive glucocorticoids
Source: PubMed Central journal article supplement (PMC10399709; doi:10.1002/1878-0261.13414), 2023-03-09
Supplement: MOL2-17-1545-s002.pdf [file MOL2-17-1545-s002.pdf]

**Suppl. Table 1: List of PCR and qRT-PCR primers****Genotyping primers**

|                           |                                           |
|---------------------------|-------------------------------------------|
| Cre for                   | 5'-GAA CCT GAT GGA CAT GTT CAG G-3'       |
| Cre rev                   | 5'-AGT GCG TTC GAA CGC TAG AGC CTG T-3'   |
| myogenin for              | 5'-TTA CGT CCA TCG TGG ACA GC-3'          |
| myogenin rev              | 5'-TGG GCT GGG TGT TAG CCT TA-3'          |
| floxed Cyp11b1 allele for | 5'-CTG AGA CAG GCA GGG ATC ATG TCT CAG-3' |
| floxed Cyp11b1 allele rev | 5'-CCC TTG CTA TCC CAT CCA CCA AGG GG-3'  |
| deletion product for      | 5'-CTG AGA CAG GCA GGG ATC ATG TCT CAG-3' |
| deletion product rev      | 5'-AGG CTG CTG CCT GTC AGG TTT TCT-3'     |

**Primers for quantitative PCR**

|                           |                                       |
|---------------------------|---------------------------------------|
| murine $\beta$ -actin for | 5'-TAT TGG CAA CGA GCG GTT CC-3'      |
| murine $\beta$ -actin rev | 5'-GCA CTG TGT TGG CAT AGA GG-3'      |
| murine cd274 for          | 5'-CAG CAA CTT CAG GGG GAG AG-3'      |
| murine cd274 rev          | 5'-TTT GCG GTA TGG GGC ATT GA-3'      |
| murine cd279 for          | 5'-CGG TTT CAA GGC ATG GTC ATT GG-3'  |
| murine cd279 rev          | 5'-TCA GAG TGT CGT CCT TGC TTC C-3'   |
| murine cd152 for          | 5'-ACT GAG AGC TGT TGA CAC GG-3'      |
| murine cd152 rev          | 5'-ACA TTC TGG CTC TGT TGG GG-3'      |
| murine Tnf for            | 5'-TAG CCC ACG TCG TAG CAA AC-3'      |
| murine Tnf rev            | 5'-ACA AGG TAC AAC CCA TCG GC-3'      |
| murine Il6 for            | 5'-CACAAGTCCGGAGAGGAGAC-3'            |
| murine Il6 rev            | 5'-TTG CCA TTG CAC AAC TCT TT-3'      |
| murine Il10 for           | 5'-GAC TTT AAG GGT TAC TTG GGT TGC-3' |
| murine Il10 rev           | 5'-GCC TGG GGC ATC ACT TCT AC-3'      |
| murine Arg1 for           | 5'-GTG AAG AAC CCA CGG TCT GT-3'      |
| murine Arg1 rev           | 5'-CTG GTT GTC AGG GGA GTG TT-3'      |

Murine Cyp11b1 and TGF $\beta$  (Tgfb) primers were obtained from Qiagen (Quantitect primers).
